# Supplementary material
Source: PubMed Central journal article supplement (PMC3923319)
Supplement: NIHMS552153-supplement-01.pdf [file NIHMS552153-supplement-01.pdf]

Supplementary figure 1. Doll et. al.

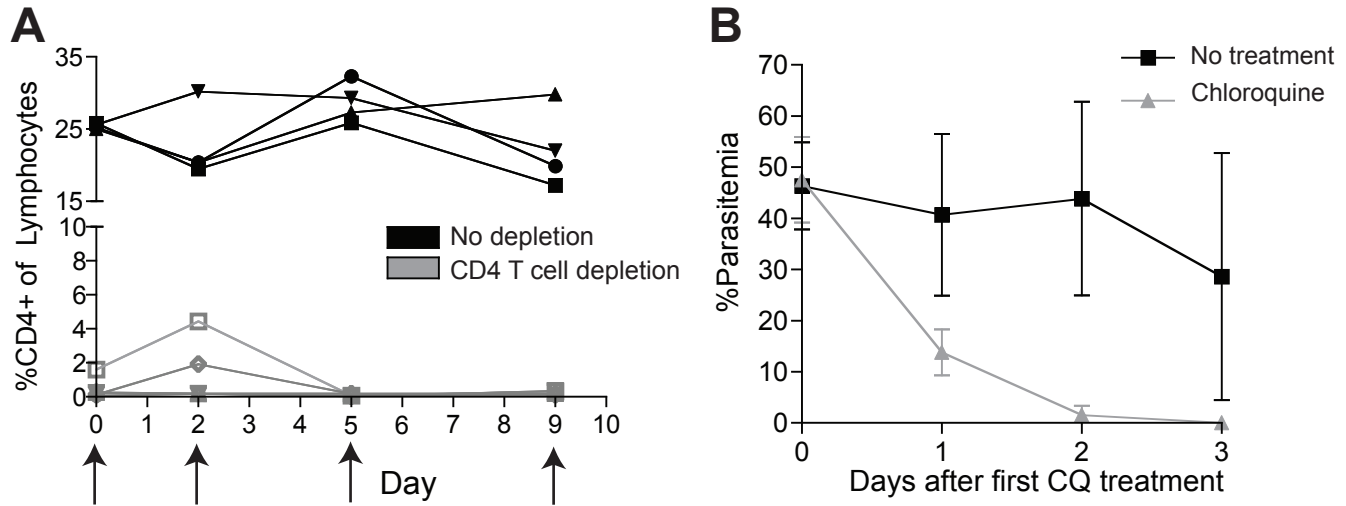

Supplementary figure 1. **(A)**, CD4 T cells were depleted from the peripheral blood of ITV C57Bl/6 mice with administration of 200 $\mu$ g of anti-CD4 (clone GK1.5) antibody. Arrows indicate when antibody was administered. CD4 T cells analyzed via staining with anti-CD4 antibody (clone RM4-5). **(B)**, Chloroquine administration quickly eliminates parasites from the peripheral blood of C57Bl/6 mice. *P. yoelii*-infected mice were treated with administration of 100 $\mu$ l I.P. of 8mg/mL chloroquine for two consecutive days (d0 and d1) and parasitemia was monitored by Giemsa thin blood smear.
