# Supplementary material
Source: PubMed Central journal article supplement (PMC3923319)
Supplement: NIHMS552153-supplement-02.pdf [file NIHMS552153-supplement-02.pdf]

Supplementary Figure 2. Doll et al.

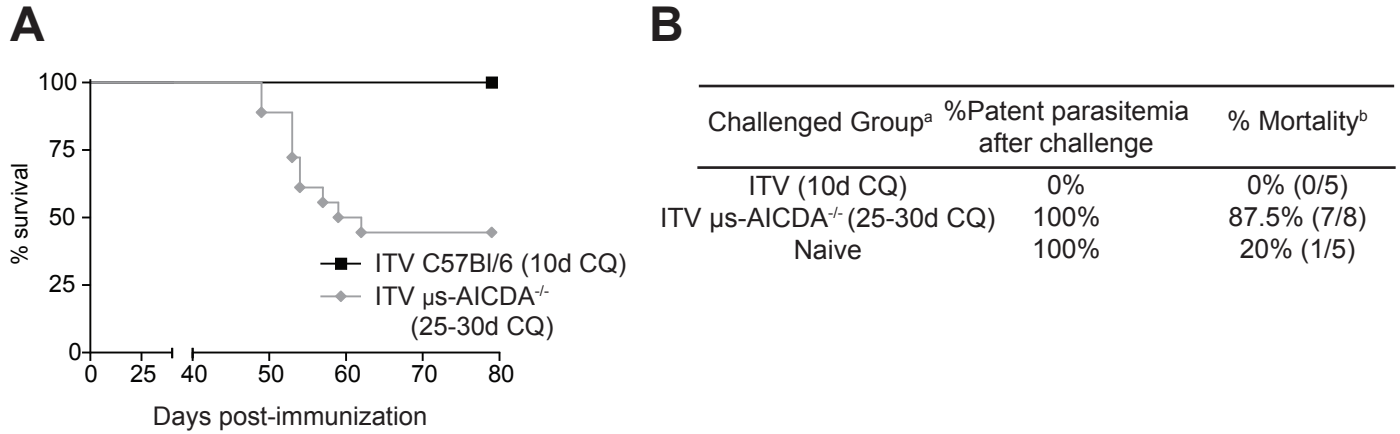

Supplementary Figure 2. Antibodies are required to control breakthrough parasitemia and to mediate protection from sporozoite challenge. **(A)**, Naive C57Bl/6 and  $\mu$ s-AICDA<sup>-/-</sup> mice were administered 10,000 virulent sporozoites with 10, or 25-30 days of CQ chemoprophylaxis, respectively. **(B)**, Mice immunized in **(A)** were challenged on d79 post-immunization with 1,000 virulent *P. yoelii* sporozoites and monitored for patent parasitemia and survival. Institutional animal guidelines for morbidity required the euthanization of last  $\mu$ s-AICDA<sup>-/-</sup> mouse.
